# Supplementary material
Source: MDPI journal article supplement (https://www.mdpi.com/2072-4292/11/24/3044)
Supplement: s1 [file s1]

# Supplementary material

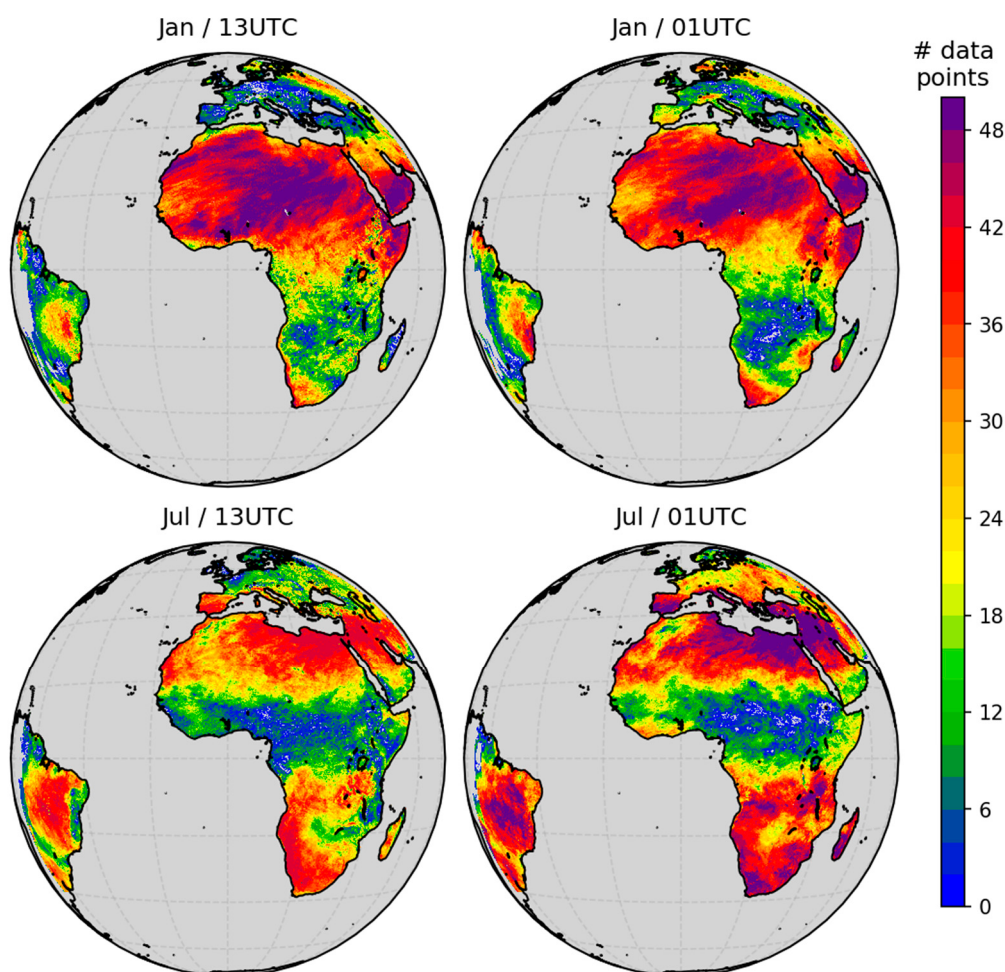

**Figure S1.** Number of data points used for the mean difference calculation, for each panel in Figure 4. White pixels denote no valid data points.

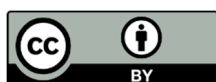

© 2019 by the authors. Submitted for possible open access publication under the terms and conditions of the Creative Commons Attribution (CC BY) license (<http://creativecommons.org/licenses/by/4.0/>).
